# Supplementary material
Source: Springer Nature journal article supplement (https://www.springermedizin.de/resource/supplementary/12888_2011_1100_MOESM1_ESM.pdf/9479528)

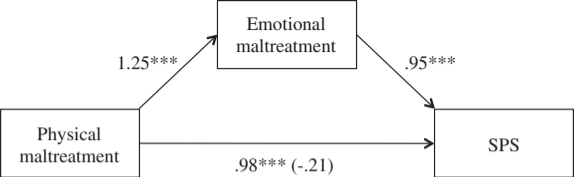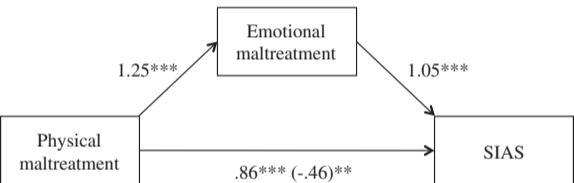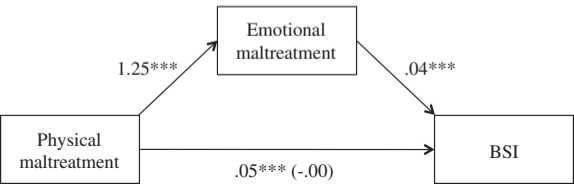

Supplement: MOESM1 [file 9479528]
